# Supplementary material for: The Late Carboniferous Mafic–Ultramafic Complex Induced by Slab Breakoff in Eastern North Tianshan, Central Asian Orogenic Belt
Source: MDPI journal article supplement (doi:10.3390/min13101293), 2023-10-04
Supplement: s1 [file s1]

**Table S1.** Zircon U-Pb ages of the Mozbaysay hornblende gabbro.

| Sample-Spot  | Th   | U    | Th/U | Isotopic ratios                      |        |                                     |        | Isotopic ages(Ma)                   |        |                                      |      |                                     |       |                                     |      | Concordance |
|--------------|------|------|------|--------------------------------------|--------|-------------------------------------|--------|-------------------------------------|--------|--------------------------------------|------|-------------------------------------|-------|-------------------------------------|------|-------------|
|              | ppm  | ppm  |      | <sup>207</sup> Pb/ <sup>206</sup> Pb | ± 1σ   | <sup>207</sup> Pb/ <sup>235</sup> U | ± 1σ   | <sup>206</sup> Pb/ <sup>238</sup> U | ± 1σ   | <sup>207</sup> Pb/ <sup>206</sup> Pb | ± 1σ | <sup>207</sup> Pb/ <sup>235</sup> U | ± 1σ  | <sup>206</sup> Pb/ <sup>238</sup> U | ± 1σ |             |
| BLK008TW1.01 | 1572 | 982  | 1.60 | 0.0531                               | 0.0011 | 0.3749                              | 0.0084 | 0.0511                              | 0.0006 | 345                                  | 51   | 323                                 | 6     | 321                                 | 4    | 99%         |
| BLK008TW1.02 | 1229 | 1045 | 1.18 | 0.0529                               | 0.0010 | 0.3544                              | 0.0081 | 0.0485                              | 0.0007 | 324                                  | 41   | 308                                 | 6     | 305                                 | 4    | 99%         |
| BLK008TW1.03 | 1754 | 1082 | 1.62 | 0.1275                               | 0.0099 | 1.0578                              | 0.1007 | 0.0567                              | 0.0013 | 2065                                 | 137  | 49.7                                | 7.9   | 30%                                 |      | 30%         |
| BLK008TW1.04 | 3719 | 2098 | 1.77 | 0.0548                               | 0.0009 | 0.3798                              | 0.0072 | 0.0502                              | 0.0006 | 406                                  | 37   | 327                                 | 5     | 315                                 | 3    | 96%         |
| BLK008TW1.05 | 2723 | 1083 | 2.52 | 0.0530                               | 0.0010 | 0.3550                              | 0.0078 | 0.0486                              | 0.0007 | 328                                  | 44   | 308                                 | 6     | 306                                 | 4    | 99%         |
| BLK008TW1.06 | 1343 | 675  | 1.99 | 0.0548                               | 0.0014 | 0.3892                              | 0.0107 | 0.0515                              | 0.0008 | 406                                  | 57   | 334                                 | 8     | 324                                 | 5    | 96%         |
| BLK008TW1.07 | 1185 | 737  | 1.61 | 0.0561                               | 0.0012 | 0.3758                              | 0.0098 | 0.0486                              | 0.0007 | 454                                  | 48   | 324                                 | 7     | 306                                 | 5    | 94%         |
| BLK008TW1.08 | 1120 | 1096 | 1.02 | 0.0579                               | 0.0022 | 0.3928                              | 0.0189 | 0.0486                              | 0.0008 | 528                                  | 83   | 336                                 | 14    | 306                                 | 5    | 90%         |
| BLK008TW1.09 | 645  | 635  | 1.01 | 0.0539                               | 0.0015 | 0.3605                              | 0.0112 | 0.0485                              | 0.0008 | 369                                  | 61   | 313                                 | 8     | 306                                 | 5    | 97%         |
| BLK008TW1.10 | 998  | 341  | 2.93 | 0.0579                               | 0.0017 | 0.4044                              | 0.0123 | 0.0508                              | 0.0008 | 528                                  | 65   | 345                                 | 9     | 319                                 | 5    | 92%         |
| BLK008TW1.11 | 1449 | 1572 | 0.92 | 0.0529                               | 0.0009 | 0.3766                              | 0.0081 | 0.0516                              | 0.0007 | 324                                  | 39   | 325                                 | 6     | 324                                 | 4    | 99%         |
| BLK008TW1.12 | 1394 | 587  | 2.37 | 0.0511                               | 0.0013 | 0.3608                              | 0.0095 | 0.0513                              | 0.0007 | 256                                  | 57   | 313                                 | 7     | 322                                 | 4    | 96%         |
| BLK008TW1.13 | 987  | 998  | 0.99 | 0.0538                               | 0.0011 | 0.3791                              | 0.0078 | 0.0511                              | 0.0006 | 365                                  | 46   | 326                                 | 6     | 322                                 | 4    | 98%         |
| BLK008TW1.14 | 2749 | 1948 | 1.41 | 0.0527                               | 0.0008 | 0.3535                              | 0.0068 | 0.0486                              | 0.0007 | 317                                  | 33   | 307                                 | 5     | 306                                 | 4    | 99%         |
| BLK008TW1.15 | 2059 | 1385 | 1.49 | 0.0515                               | 0.0010 | 0.3454                              | 0.0079 | 0.0487                              | 0.0007 | 265                                  | 43   | 301                                 | 6     | 306                                 | 4    | 98%         |
| BLK008TW1.16 | 2681 | 1544 | 1.74 | 0.0515                               | 0.0010 | 0.3444                              | 0.0077 | 0.0486                              | 0.0006 | 261                                  | 44   | 300                                 | 6     | 306                                 | 4    | 98%         |
| BLK008TW1.17 | 701  | 238  | 2.95 | 0.0530                               | 0.0020 | 0.3538                              | 0.0135 | 0.0486                              | 0.0008 | 328                                  | 85   | 308                                 | 10    | 306                                 | 5    | 99%         |
| BLK008TW1.18 | 1038 | 916  | 1.13 | 0.0493                               | 0.0011 | 0.3624                              | 0.0093 | 0.0533                              | 0.0006 | 165                                  | 54   | 314                                 | 7     | 334                                 | 4    | 93%         |
| BLK008TW1.19 | 1231 | 502  | 2.45 | 0.0528                               | 0.0018 | 0.3725                              | 0.0140 | 0.0510                              | 0.0007 | 320                                  | 78   | 321                                 | 10    | 321                                 | 4    | 99%         |
| BLK008TW1.20 | 981  | 635  | 1.55 | 0.0515                               | 0.0013 | 0.3689                              | 0.0100 | 0.0520                              | 0.0006 | 265                                  | 55   | 319                                 | 7     | 327                                 | 4    | 97%         |
| BLK008TW1.21 | 1088 | 755  | 1.44 | 0.0500                               | 0.0011 | 0.3351                              | 0.0080 | 0.0486                              | 0.0007 | 198                                  | 55   | 293                                 | 6     | 306                                 | 4    | 95%         |
| BLK008TW1.22 | 1824 | 1218 | 1.50 | 0.0521                               | 0.0010 | 0.3480                              | 0.0072 | 0.0485                              | 0.0007 | 300                                  | 38   | 303                                 | 5     | 305                                 | 4    | 99%         |
| BLK008TW1.23 | 342  | 244  | 1.28 | 0.1294                               | 0.0209 | 1.3983                              | 0.3046 | 0.0596                              | 0.0029 | 2100                                 | 287  | 888.2                               | 129.6 | 373.1                               | 17.7 | 18%         |
| BLK008TW1.24 | 903  | 409  | 2.21 | 0.0504                               | 0.0014 | 0.3555                              | 0.0101 | 0.0512                              | 0.0007 | 213                                  | 67   | 309                                 | 8     | 322                                 | 4    | 95%         |
| BLK008TW1.25 | 509  | 424  | 1.20 | 0.0510                               | 0.0016 | 0.3588                              | 0.0126 | 0.0509                              | 0.0009 | 243                                  | 77   | 311                                 | 9     | 320                                 | 5    | 97%         |
| BLK008TW1.26 | 717  | 428  | 1.67 | 0.0527                               | 0.0014 | 0.3528                              | 0.0096 | 0.0485                              | 0.0007 | 317                                  | 61   | 307                                 | 7     | 305                                 | 4    | 99%         |
| BLK008TW1.27 | 2755 | 1878 | 1.47 | 0.0515                               | 0.0010 | 0.3461                              | 0.0071 | 0.0486                              | 0.0007 | 265                                  | 43   | 302                                 | 5     | 306                                 | 4    | 98%         |
| BLK008TW1.28 | 1059 | 699  | 1.52 | 0.0533                               | 0.0012 | 0.3759                              | 0.0087 | 0.0510                              | 0.0006 | 343                                  | 45   | 324                                 | 6     | 320                                 | 4    | 98%         |
| BLK008TW1.29 | 2669 | 730  | 3.66 | 0.0527                               | 0.0013 | 0.3541                              | 0.0085 | 0.0488                              | 0.0008 | 317                                  | 57   | 308                                 | 6     | 307                                 | 5    | 99%         |
| BLK008TW1.30 | 3761 | 1515 | 2.48 | 0.0540                               | 0.0011 | 0.3632                              | 0.0085 | 0.0486                              | 0.0007 | 369                                  | 44   | 315                                 | 6     | 306                                 | 4    | 97%         |
| BLK008TW1.31 | 1370 | 862  | 1.59 | 0.0523                               | 0.0012 | 0.3704                              | 0.0084 | 0.0513                              | 0.0006 | 298                                  | 47   | 320                                 | 6     | 323                                 | 4    | 99%         |
| BLK008TW1.32 | 1974 | 968  | 2.04 | 0.0717                               | 0.0043 | 0.5189                              | 0.0396 | 0.0509                              | 0.0011 | 977                                  | 123  | 424.4                               | 26.5  | 319.9                               | 7.0  | 71%         |
| BLK008TW1.33 | 1197 | 682  | 1.76 | 0.0542                               | 0.0015 | 0.3786                              | 0.0104 | 0.0506                              | 0.0006 | 389                                  | 63   | 326                                 | 8     | 318                                 | 3    | 97%         |
| BLK008TW1.34 | 310  | 304  | 1.02 | 0.0559                               | 0.0021 | 0.3997                              | 0.0137 | 0.0522                              | 0.0007 | 456                                  | 85   | 341                                 | 10    | 328                                 | 4    | 96%         |
| BLK008TW1.35 | 686  | 472  | 1.45 | 0.0553                               | 0.0014 | 0.3691                              | 0.0088 | 0.0485                              | 0.0007 | 433                                  | 56   | 319                                 | 7     | 305                                 | 4    | 95%         |
| BLK008TW1.36 | 1749 | 1214 | 1.44 | 0.0535                               | 0.0011 | 0.3586                              | 0.0086 | 0.0485                              | 0.0006 | 350                                  | 48   | 311                                 | 6     | 305                                 | 4    | 98%         |
| BLK008TW1.37 | 273  | 340  | 0.80 | 0.0541                               | 0.0018 | 0.3797                              | 0.0126 | 0.0509                              | 0.0006 | 376                                  | 76   | 327                                 | 9     | 320                                 | 4    | 97%         |
| BLK008TW1.38 | 1335 | 1346 | 0.99 | 0.0528                               | 0.0011 | 0.3542                              | 0.0076 | 0.0486                              | 0.0006 | 320                                  | 46   | 308                                 | 6     | 306                                 | 3    | 99%         |
| BLK008TW1.39 | 982  | 722  | 1.36 | 0.0569                               | 0.0012 | 0.4056                              | 0.0089 | 0.0517                              | 0.0006 | 487                                  | 81   | 346                                 | 6     | 325                                 | 4    | 93%         |
| BLK008TW1.40 | 3205 | 1192 | 2.69 | 0.0544                               | 0.0012 | 0.3637                              | 0.0088 | 0.0485                              | 0.0007 | 387                                  | 45   | 315                                 | 7     | 305                                 | 4    | 96%         |

**Table S2.** Whole-rock major and trace elements of the Mozbaysay lherzolites and hornblende gabbros in this study.

| Rock type                                   | Iherzolites |         |         |         |         |         |         |         |         |         | Hornblende gabbros |         |         |          |          |          |         |         |         |          |
|---------------------------------------------|-------------|---------|---------|---------|---------|---------|---------|---------|---------|---------|--------------------|---------|---------|----------|----------|----------|---------|---------|---------|----------|
| Sample                                      | BLK005D     | BLK005D | BLK00   | BLK005D | BLK00   | BLK007D | BLK00   | BLK00   | BLK00   | BLK007D | BLK006D            | BLK006D | BLK00   | BLK006D  | BLK00    | BLK008D  | BLK008D | BLK00   | BLK008D | BLK008D  |
|                                             | H1          | H2      | 5DH3    | H4      | 5DH5    | H1      | 7DH2    | 7DH3    | 7DH4    | H5      | H1                 | H2      | 6DH3    | H4       | 6DH5     | H1       | H2      | 8DH3    | H4      | H5       |
| SiO <sub>2</sub>                            | 43.75       | 42.58   | 43.79   | 44.02   | 43.28   | 44.59   | 40.34   | 41.72   | 41.64   | 41.53   | 47.13              | 46.78   | 44.11   | 45.50    | 47.40    | 46.15    | 47.02   | 45.68   | 45.37   | 47.70    |
| Al <sub>2</sub> O <sub>3</sub>              | 10.58       | 9.19    | 6.80    | 6.94    | 8.20    | 10.46   | 7.74    | 7.01    | 6.23    | 7.57    | 17.35              | 17.74   | 17.71   | 17.54    | 15.80    | 17.85    | 18.78   | 18.71   | 16.94   | 18.39    |
| <sup>7</sup> Fe <sub>2</sub> O <sub>3</sub> | 14.18       | 15.25   | 16.92   | 16.64   | 17.30   | 15.62   | 13.84   | 14.93   | 15.48   | 14.86   | 6.64               | 6.70    | 6.52    | 9.05     | 10.37    | 8.86     | 7.93    | 7.90    | 11.19   | 9.71     |
| MgO                                         | 24.89       | 26.94   | 30.33   | 30.16   | 28.59   | 26.73   | 25.29   | 27.48   | 28.94   | 27.62   | 9.47               | 7.68    | 9.66    | 9.53     | 8.69     | 9.18     | 9.69    | 10.98   | 10.77   | 8.11     |
| CaO                                         | 5.90        | 5.11    | 3.33    | 4.09    | 3.88    | 4.91    | 4.64    | 4.06    | 3.40    | 4.06    | 8.42               | 8.60    | 8.80    | 7.71     | 8.52     | 8.23     | 9.77    | 9.97    | 9.24    | 8.53     |
| Na <sub>2</sub> O                           | 0.59        | 0.61    | 0.54    | 0.44    | 0.48    | 0.56    | 0.24    | 0.28    | 0.20    | 0.24    | 3.41               | 3.62    | 3.62    | 3.65     | 3.52     | 3.64     | 2.56    | 2.09    | 1.96    | 2.96     |
| K <sub>2</sub> O                            | 0.40        | 0.86    | 0.88    | 0.57    | 0.50    | 0.44    | 0.79    | 0.70    | 0.61    | 0.38    | 0.78               | 0.91    | 0.49    | 1.33     | 1.39     | 1.98     | 1.11    | 0.46    | 0.56    | 1.87     |
| MnO                                         | 0.23        | 0.24    | 0.27    | 0.26    | 0.29    | 0.28    | 0.25    | 0.28    | 0.29    | 0.27    | 0.09               | 0.11    | 0.08    | 0.13     | 0.14     | 0.17     | 0.12    | 0.13    | 0.15    | 0.17     |
| TiO <sub>2</sub>                            | 0.52        | 0.51    | 0.64    | 0.61    | 0.48    | 0.46    | 0.57    | 0.61    | 0.57    | 0.54    | 0.70               | 0.72    | 0.91    | 1.07     | 1.40     | 1.08     | 1.44    | 1.28    | 1.35    | 1.34     |
| P <sub>2</sub> O <sub>5</sub>               | 0.13        | 0.13    | 0.15    | 0.14    | 0.03    | 0.04    | 0.13    | 0.14    | 0.12    | 0.13    | 0.14               | 0.15    | 0.19    | 0.21     | 0.26     | 0.24     | 0.12    | 0.09    | 0.23    | 0.24     |
| LOI                                         | 3.21        | 5.83    | 3.21    | 3.40    | 3.45    | 4.54    | 6.45    | 3.16    | 2.82    | 3.09    | 3.44               | 2.79    | 4.37    | 3.69     | 2.81     | 3.98     | 3.39    | 3.69    | 3.72    | 3.10     |
| <sup>7</sup> FeO                            | 14.18       | 15.25   | 16.92   | 16.64   | 17.30   | 15.62   | 13.84   | 14.93   | 15.48   | 14.86   | 7.64               | 6.70    | 6.52    | 9.05     | 10.37    | 8.86     | 7.93    | 7.90    | 11.19   | 9.71     |
| Mg#                                         | 75.78       | 75.90   | 76.16   | 76.36   | 74.66   | 75.31   | 76.51   | 76.64   | 76.92   | 76.82   | 68.84              | 67.14   | 72.53   | 65.24    | 59.90    | 64.87    | 68.54   | 71.24   | 63.18   | 59.82    |
| Ti                                          | 3141.38     | 3039.47 | 3249.29 | 3051.46 | 2871.61 | 2769.69 | 3417.15 | 3656.95 | 3417.15 | 3237.30 | 4178.52            | 4322.40 | 5431.47 | 6414.65  | 8393.00  | 6474.60  | 4316.40 | 3836.80 | 8093.25 | 8033.30  |
| P                                           | 580.49      | 563.03  | 654.69  | 606.68  | 144.03  | 187.68  | 567.40  | 611.04  | 523.75  | 567.40  | 615.41             | 650.33  | 807.45  | 899.11   | 1126.07  | 1043.14  | 523.75  | 392.81  | 1003.86 | 1047.50  |
| K                                           | 3287.31     | 7155.72 | 7280.24 | 4690.23 | 4183.86 | 3627.67 | 6558.03 | 5810.91 | 5063.79 | 3154.49 | 6508.22            | 7545.88 | 4075.94 | 11040.73 | 11538.81 | 16436.57 | 4565.72 | 1909.30 | 4648.73 | 15523.43 |
| Li                                          | 23.70       | 18.10   | 21.60   | 19.00   | 28.90   | 26.40   | 21.80   | 15.60   | 21.10   | 21.70   | 7.06               | 5.29    | 26.60   | 19.60    | 25.80    | 24.10    | 6.05    | 7.49    | 16.20   | 18.20    |
| Be                                          | 0.51        | 0.30    | 0.23    | 0.31    | 0.43    | 0.33    | 0.32    | 0.37    | 0.38    | 0.34    | 0.42               | 0.46    | 0.42    | 0.55     | 0.86     | 0.53     | 0.51    | 0.49    | 0.72    | 0.83     |
| Sc                                          | 34.40       | 44.10   | 40.20   | 33.00   | 36.10   | 31.50   | 15.70   | 17.10   | 15.20   | 15.20   | 49.40              | 53.60   | 39.90   | 43.40    | 42.40    | 42.60    | 14.70   | 11.60   | 16.10   | 15.40    |
| V                                           | 106.00      | 110.00  | 108.00  | 103.00  | 113.00  | 89.80   | 99.90   | 100.00  | 90.50   | 87.60   | 170.00             | 191.00  | 172.00  | 180.00   | 260.00   | 188.00   | 152.00  | 113.00  | 207.00  | 235.00   |
| Co                                          | 98.50       | 104.00  | 114.00  | 118.00  | 116.00  | 104.00  | 112.00  | 122.00  | 124.00  | 124.00  | 42.50              | 42.70   | 42.40   | 49.00    | 48.50    | 44.50    | 47.00   | 47.70   | 51.10   | 44.40    |
| Ni                                          | 722.00      | 822.10  | 928.00  | 930.60  | 845.00  | 729.60  | 922.00  | 987.00  | 1041.00 | 1007.00 | 111.20             | 66.60   | 221.20  | 193.60   | 149.00   | 170.60   | 123.00  | 130.00  | 247.00  | 162.00   |
| Cu                                          | 50.20       | 39.80   | 41.40   | 60.90   | 78.80   | 78.90   | 8.25    | 34.00   | 53.40   | 62.00   | 11.80              | 16.00   | 19.70   | 64.10    | 26.10    | 75.30    | 2.91    | 21.90   | 75.30   | 49.50    |
| Zn                                          | 137.00      | 136.00  | 140.00  | 157.00  | 176.00  | 169.00  | 120.00  | 139.00  | 153.00  | 144.00  | 36.40              | 40.10   | 46.10   | 54.80    | 64.50    | 95.20    | 32.80   | 52.70   | 58.50   | 39.30    |
| Ga                                          | 9.70        | 8.68    | 7.59    | 7.74    | 7.87    | 8.60    | 8.46    | 8.51    | 7.77    | 8.26    | 16.30              | 16.90   | 16.70   | 16.40    | 18.90    | 17.10    | 16.00   | 15.90   | 17.90   | 17.60    |
| Rb                                          | 15.30       | 19.30   | 18.70   | 13.50   | 19.30   | 11.90   | 17.90   | 15.80   | 13.90   | 8.23    | 14.50              | 15.40   | 7.37    | 27.20    | 34.10    | 35.90    | 9.92    | 4.31    | 10.70   | 33.80    |
| Sr                                          | 210.00      | 180.00  | 99.30   | 139.00  | 169.00  | 235.00  | 109.00  | 153.00  | 133.00  | 202.00  | 437.00             | 466.00  | 405.00  | 914.00   | 579.00   | 958.00   | 460.00  | 425.00  | 430.00  | 610.00   |
| Zr                                          | 59.30       | 65.00   | 58.80   | 62.50   | 63.20   | 61.30   | 58.80   | 58.90   | 62.70   | 59.40   | 107.00             | 104.00  | 102.00  | 120.00   | 130.00   | 126.00   | 131.20  | 116.40  | 111.00  | 108.00   |
| Nb                                          | 2.71        | 2.11    | 2.55    | 2.15    | 2.09    | 1.62    | 2.53    | 2.69    | 2.52    | 2.37    | 2.82               | 2.52    | 3.66    | 3.99     | 5.26     | 4.33     | 4.88    | 4.84    | 5.43    | 5.15     |
| Mo                                          | 0.21        | 0.55    | 0.63    | 0.50    | 0.10    | 0.11    | 0.25    | 0.21    | 0.67    | 0.11    | 0.39               | 0.46    | 0.26    | 0.40     | 0.15     | 0.47     | 0.10    | 0.10    | 0.12    | 0.14     |
| In                                          | 0.08        | 0.02    | 0.03    | 0.03    | 0.07    | 0.05    | 0.03    | 0.03    | 0.03    | 0.03    | 0.03               | 0.04    | 0.07    | 0.05     | 0.11     | 0.05     | 0.04    | 0.04    | 0.07    | 0.06     |
| Cs                                          | 4.60        | 1.81    | 1.70    | 1.43    | 5.03    | 3.55    | 1.57    | 1.33    | 1.26    | 1.50    | 1.10               | 1.01    | 0.86    | 1.26     | 3.18     | 2.46     | 0.70    | 0.36    | 1.45    | 0.96     |
| Ba                                          | 622.00      | 171.00  | 125.00  | 90.20   | 640.00  | 562.00  | 122.00  | 106.00  | 99.00   | 94.90   | 211.00             | 189.00  | 67.20   | 393.00   | 1022.00  | 790.00   | 150.00  | 74.30   | 86.30   | 605.00   |
| Hf                                          | 1.27        | 2.02    | 2.12    | 1.55    | 1.36    | 1.30    | 1.32    | 1.38    | 1.44    | 1.32    | 2.21               | 2.16    | 2.10    | 2.42     | 2.67     | 2.61     | 2.59    | 2.42    | 2.37    | 2.34     |
| Ta                                          | 0.25        | 0.28    | 0.20    | 0.13    | 0.25    | 0.18    | 0.21    | 0.21    | 0.22    | 0.20    | 0.50               | 0.34    | 0.18    | 0.43     | 0.32     | 0.65     | 0.36    | 0.38    | 0.40    | 0.36     |
| W                                           | 0.27        | 0.32    | 0.34    | 0.26    | 0.34    | 0.26    | 0.22    | 0.26    | 0.17    | 0.17    | 0.14               | 0.19    | 0.10    | 0.34     | 0.19     | 0.23     | 0.06    | 0.10    | 0.31    | 0.33     |
| Tl                                          | 0.58        | 0.08    | 0.07    | 0.07    | 0.58    | 0.45    | 0.09    | 0.08    | 0.07    | 0.10    | 0.06               | 0.05    | 0.05    | 0.19     | 0.54     | 0.20     | 0.05    | 0.03    | 0.08    | 0.22     |
| Pb                                          | 15.50       | 6.20    | 4.57    | 15.90   | 19.80   | 13.30   | 6.49    | 3.96    | 4.98    | 5.37    | 1.81               | 1.90    | 8.50    | 1.41     | 8.14     | 2.92     | 0.93    | 1.60    | 1.81    | 2.04     |
| Bi                                          | 0.31        | 0.02    | 0.02    | 0.02    | 0.36    | 0.45    | 0.01    | 0.02    | 0.01    | 0.01    | 0.01               | 0.01    | 0.00    | 0.07     | 0.24     | 0.02     | 0.01    | 0.01    | 0.01    | 0.01     |
| Th                                          | 0.46        | 0.49    | 0.51    | 0.52    | 0.32    | 0.24    | 0.39    | 0.39    | 0.38    | 0.42    | 0.68               | 0.71    | 0.53    | 0.59     | 0.65     | 0.66     | 0.40    | 0.26    | 0.57    | 0.56     |
| U                                           | 0.18        | 0.15    | 0.16    | 0.15    | 0.14    | 0.11    | 0.12    | 0.12    | 0.12    | 0.12    | 0.21               | 0.28    | 0.24    | 0.23     | 0.21     | 0.22     | 0.19    | 0.22    | 0.25    | 0.26     |
| Cr                                          | 1394.00     | 1583.00 | 2493.00 | 2098.00 | 1643.00 | 1332.00 | 1801.00 | 2111.00 | 2110.00 | 1938.00 | 408.00             | 278.00  | 217.00  | 216.00   | 165.00   | 207.00   | 367.00  | 313.00  | 220.00  | 185.00   |
| Y                                           | 11.70       | 9.75    | 10.10   | 10.60   | 5.78    | 4.79    | 10.30   | 11.60   | 10.60   | 10.40   | 15.00              | 13.50   | 15.30   | 16.70    | 24.20    | 18.10    | 23.00   | 20.20   | 19.70   | 19.90    |
| La                                          | 4.88        | 4.61    | 4.53    | 4.65    | 4.44    | 3.47    | 3.98    | 4.26    | 3.96    | 4.43    | 6.42               | 7.01    | 9.31    | 11.20    | 11.00    | 9.64     | 10.06   | 9.95    | 10.70   | 11.00    |

|        |       |       |       |       |      |      |      |      |      |      |       |       |       |       |       |       |       |       |       |       |
|--------|-------|-------|-------|-------|------|------|------|------|------|------|-------|-------|-------|-------|-------|-------|-------|-------|-------|-------|
| Ce     | 13.80 | 10.60 | 10.10 | 10.20 | 7.78 | 5.90 | 8.19 | 9.00 | 8.21 | 9.22 | 14.30 | 15.60 | 24.00 | 19.50 | 27.10 | 21.10 | 23.00 | 20.40 | 22.60 | 23.50 |
| Pr     | 1.55  | 1.56  | 1.44  | 1.49  | 1.16 | 0.98 | 1.23 | 1.36 | 1.24 | 1.36 | 2.02  | 2.16  | 3.46  | 2.58  | 3.63  | 2.95  | 3.70  | 2.98  | 3.23  | 3.38  |
| Nd     | 7.28  | 7.21  | 6.62  | 7.02  | 6.04 | 7.04 | 5.98 | 6.61 | 6.01 | 6.47 | 9.12  | 9.50  | 14.90 | 11.80 | 16.70 | 13.60 | 16.40 | 13.80 | 15.20 | 15.60 |
| Sm     | 1.90  | 1.74  | 1.66  | 1.81  | 1.66 | 1.84 | 1.61 | 1.77 | 1.61 | 1.67 | 2.22  | 2.19  | 3.09  | 2.83  | 4.02  | 3.27  | 4.48  | 3.64  | 3.78  | 3.93  |
| Eu     | 0.62  | 0.47  | 0.42  | 0.42  | 0.52 | 0.54 | 0.43 | 0.46 | 0.39 | 0.42 | 0.88  | 1.03  | 1.40  | 1.80  | 1.71  | 1.53  | 1.86  | 1.75  | 1.37  | 1.72  |
| Gd     | 1.95  | 1.60  | 1.62  | 1.75  | 1.77 | 1.93 | 1.95 | 1.89 | 1.72 | 1.81 | 2.13  | 2.18  | 2.77  | 2.75  | 3.93  | 3.00  | 2.25  | 2.89  | 3.84  | 3.99  |
| Tb     | 0.36  | 0.30  | 0.32  | 0.34  | 0.28 | 0.20 | 0.30 | 0.34 | 0.31 | 0.31 | 0.39  | 0.40  | 0.50  | 0.52  | 0.75  | 0.56  | 0.39  | 0.33  | 0.66  | 0.68  |
| Dy     | 2.24  | 1.83  | 1.95  | 2.07  | 1.95 | 1.70 | 1.99 | 2.19 | 2.01 | 1.98 | 2.41  | 2.46  | 2.98  | 3.14  | 4.56  | 3.50  | 3.48  | 3.27  | 4.18  | 4.24  |
| Ho     | 0.44  | 0.37  | 0.39  | 0.41  | 0.42 | 0.34 | 0.39 | 0.43 | 0.39 | 0.38 | 0.49  | 0.50  | 0.56  | 0.62  | 0.92  | 0.68  | 0.48  | 0.43  | 0.80  | 0.83  |
| Er     | 1.63  | 1.08  | 1.14  | 1.17  | 1.00 | 1.06 | 1.07 | 1.18 | 1.11 | 1.05 | 1.44  | 1.44  | 1.69  | 1.80  | 2.70  | 2.00  | 1.31  | 1.16  | 2.19  | 2.26  |
| Tm     | 0.17  | 0.14  | 0.16  | 0.15  | 0.11 | 0.16 | 0.17 | 0.19 | 0.17 | 0.16 | 0.19  | 0.20  | 0.23  | 0.25  | 0.36  | 0.28  | 0.20  | 0.18  | 0.34  | 0.35  |
| Yb     | 1.13  | 1.01  | 1.08  | 1.04  | 1.02 | 0.96 | 1.09 | 1.15 | 1.11 | 0.99 | 1.31  | 1.33  | 1.51  | 1.65  | 2.39  | 1.87  | 1.82  | 1.74  | 2.09  | 2.12  |
| Lu     | 0.17  | 0.15  | 0.16  | 0.15  | 0.13 | 0.12 | 0.16 | 0.18 | 0.17 | 0.15 | 0.19  | 0.19  | 0.21  | 0.24  | 0.35  | 0.26  | 0.19  | 0.17  | 0.31  | 0.31  |
| Eu/Eu* | 0.98  | 0.85  | 0.77  | 0.71  | 0.92 | 0.87 | 0.74 | 0.76 | 0.71 | 0.73 | 1.22  | 1.43  | 1.43  | 1.95  | 1.30  | 1.47  | 1.59  | 1.59  | 1.09  | 1.32  |

Note:  $Mg^{\#}$  = molar ratio of  $MgO/(MgO + FeO) \times 100$ ;  $\delta Eu = Eu/Eu^* = 2Eu_N(Sm_N \times Gd_N)$ , N represents Chondrite normalization (Chondrite data from Sun and Mcdough, 1989).

**Table S3.** Sr-Nd isotopic compositions of the Mozbaysay lherzolites and hornblende gabbros in this study.

| Sample    | Age (Ma) | Rb(ppm) | Sr(ppm) | $^{87}Rb/^{86}Sr$ | $(^{87}Sr/^{86}Sr)_0$ | $(^{87}Sr/^{86}Sr)_i$ | Sm(ppm) | Nd(ppm) | $^{147}Sm/^{144}Nd$ | $(^{143}Nd/^{144}Nd)_0$ | $(^{143}Nd/^{144}Nd)_i$ | $\epsilon_{Nd}$ (t) | $T_{DMI}/Ma$ |
|-----------|----------|---------|---------|-------------------|-----------------------|-----------------------|---------|---------|---------------------|-------------------------|-------------------------|---------------------|--------------|
| BLK005DH1 | 306      | 15.33   | 210.30  | 0.210798          | 0.703907              | 0.702989              | 1.90    | 7.28    | 0.158018            | 0.513023                | 0.512706                | 9.0                 | 352          |
| BLK005DH3 | 306      | 18.65   | 99.25   | 0.543477          | 0.705521              | 0.703155              | 1.66    | 6.62    | 0.151589            | 0.512969                | 0.512665                | 8.2                 | 449          |
| BLK005DH4 | 306      | 13.53   | 139.10  | 0.281308          | 0.705007              | 0.703782              | 1.81    | 7.02    | 0.155690            | 0.512918                | 0.512606                | 7.1                 | 613          |
| BLK007DH1 | 306      | 11.90   | 234.80  | 0.146559          | 0.703900              | 0.703262              | 1.84    | 7.04    | 0.157930            | 0.512933                | 0.512616                | 7.3                 | 598          |
| BLK007DH3 | 306      | 15.80   | 153.00  | 0.298665          | 0.705202              | 0.703901              | 1.77    | 6.61    | 0.161805            | 0.512885                | 0.512561                | 6.2                 | 782          |
| BLK006DH1 | 306      | 14.54   | 436.50  | 0.096328          | 0.704098              | 0.703679              | 2.22    | 9.12    | 0.147255            | 0.512860                | 0.512565                | 6.3                 | 670          |
| BLK006DH4 | 306      | 27.18   | 913.80  | 0.086015          | 0.704193              | 0.703818              | 2.83    | 11.79   | 0.145144            | 0.512897                | 0.512606                | 7.1                 | 567          |
| BLK008DH2 | 306      | 9.92    | 460.00  | 0.062362          | 0.703980              | 0.703709              | 4.48    | 16.40   | 0.165065            | 0.512986                | 0.512655                | 8.0                 | 520          |
| BLK008DH4 | 306      | 10.70   | 430.00  | 0.071960          | 0.704187              | 0.703874              | 3.78    | 15.20   | 0.150269            | 0.512913                | 0.512612                | 7.2                 | 573          |
| BLK008DH5 | 306      | 33.80   | 610.00  | 0.160242          | 0.704497              | 0.703799              | 3.93    | 15.60   | 0.152226            | 0.512890                | 0.512585                | 6.7                 | 648          |

## Appendix A1

### Analytical methods

#### Zircon U-Pb dating

LA-ICP-MS in-situ zircon U-Pb dating was measured at the State Key Laboratory of Continental Dynamics, Northwest University, Xi'an, China. Zircon grains were extracted by using the traditional heavy liquid and magnetic techniques and then were randomly fastened to the adhesive tape. To observe the internal structure before analysis, cathodoluminescence (CL) images of the selected crystals were performed by a Gatan Mono CL <sup>3+</sup> fluorescence spectrometer. During LA-ICP-MS analysis, the laser ablation spot size was about 30  $\mu\text{m}$  and the frequency was 6 Hz. Harvard zircon 91500 was used as an external standard sample to correct for mass deviation and elemental fractionation. Glitter 4.0 software (Macquarie University, Australia) and ISOPLOT 3.0 were used to calculate and plot the acquired data (Ludwig, 2003).

#### Whole-rock major and trace element analyses

Major oxides of whole-rock samples were analyzed by X-ray fluorescence (XRF) and selected trace elements were analyzed by ICP-MS (PE 6100 DRC) at the State Key Laboratory of Continental Dynamics, Northwest University, Xi'an, China. Elemental standards BHVO-1(basalt) and AGV-1(andesite) were used to calibrate the elemental concentrations of the measured samples. The analytical precisions were better than 5% for the major elements and 2% for most of the trace elements. The sample preparation process and other details were described by Liu et al. (2007).

#### Whole-rock Sr-Nd isotopic analyses

Whole-rock Sr-Nd isotopic data were obtained using a Neptune Plasma high-resolution (HR) multicollector (MC) mass spectrometer at the State Key Laboratory of Continental Dynamics, Northwest University, Xi'an, China. The Sr and Nd isotopes were determined using a method similar to that of Chu et al. (2009). Sr and Nd isotopic fractionation was corrected to  $^{87}\text{Sr}/^{86}\text{Sr}=0.1194$  and  $^{146}\text{Nd}/^{144}\text{Nd}=0.7219$ , respectively. During the sample runs, the La Jolla standard yielded an average value of  $^{143}\text{Nd}/^{144}\text{Nd}=0.511862 \pm 5$  ( $2\sigma$ ), and the NBS987 standard yielded an average value of  $^{87}\text{Sr}/^{86}\text{Sr}=0.710236 \pm 16$  ( $2\sigma$ ). The total procedural Sr and Nd blanks

are b1 ng and b50 pg, and NIST SRM-987 and JMC-Nd were used as certified reference standard solutions for  $^{87}\text{Sr}/^{86}\text{Sr}$  and  $^{143}\text{Nd}/^{144}\text{Nd}$  isotopic ratios, respectively. The BCR-1 and BHVO-1 standards yielded an average of  $^{87}\text{Sr}/^{86}\text{Sr}$  ratio are  $0.705014 \pm 3$  ( $2\sigma$ ) and  $0.703477 \pm 20$  ( $2\sigma$ ), respectively. The BCR-1 and BHVO-1 standards yielded an average of  $^{146}\text{Nd}/^{144}\text{Nd}$  ratio are  $0.512615 \pm 12$  ( $2\sigma$ ) and  $0.512987 \pm 23$  ( $2\sigma$ ), respectively.

#### References for the supplementary file

1. Ludwig, K.R. *ISOPLLOT 3.0: A geochronological toolkit for Microsoft Excel: Berkeley Geochronology Center; Special Publication, No. 4.; Geochronology Center Special Publication: Berkley, CA, USA, 2003.*
2. Liu, Y.; Liu, X.M.; Hu, Z.C.; Diwu, C.R.; Yuan, H.L.; Gao, S. Evaluation of accuracy and long-term stability of determination of 37 trace elements in geological samples by ICP-MS. *Acta Petrol. Sin.* **2007**, *23*, 1203–1210. (In Chinese with English abstract)
3. Chu, Z.Y.; Chen, F.K.; Yang, Y.H.; Guo, J.H. Precise determination of Sm, Nd concentrations and Nd isotopic compositions at the nanogram level in geological samples by thermal ionization mass spectrometry. *J. Anal. At. Spectrom.* **2009**, *24*, 1534–1544.
